# Supplementary material for: Solving an Old Puzzle: Elucidation and Evaluation of the Binding Mode of Salvinorin A at the Kappa Opioid Receptor
Source: MDPI journal article supplement (doi:10.3390/molecules28020718), 2023-01-11
Supplement: s1 [file s1]

## *Supporting Materials*

# **Solving an Old Puzzle: Elucidation and Evaluation of the Binding Mode of Salvinorin A at the Kappa Opioid Receptor**

**Kristina Puls and Gerhard Wolber\***

Department of Biology, Chemistry and Pharmacy, Institute of Pharmacy, Freie Universität Berlin; Königin-Luise-Str. 2+4, 14195 Berlin, Germany

\*Correspondence: [gerhard.wolber@fu-berlin.de](mailto:gerhard.wolber@fu-berlin.de) (G.W.), Tel.: +49-30-838-52686

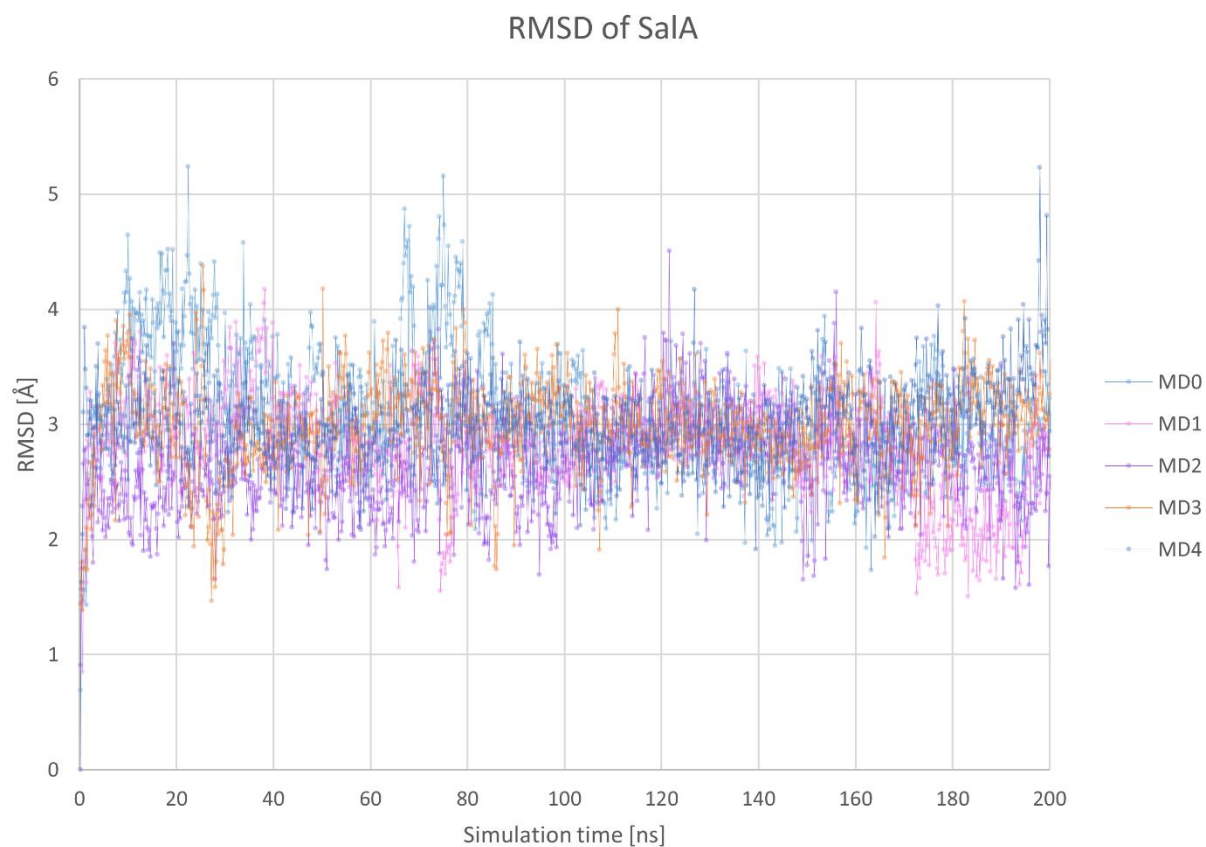

**Figure S1.** Root mean square deviation of SalA (**1**) in complex with the kappa opioid receptor (KOR) over the simulation time.

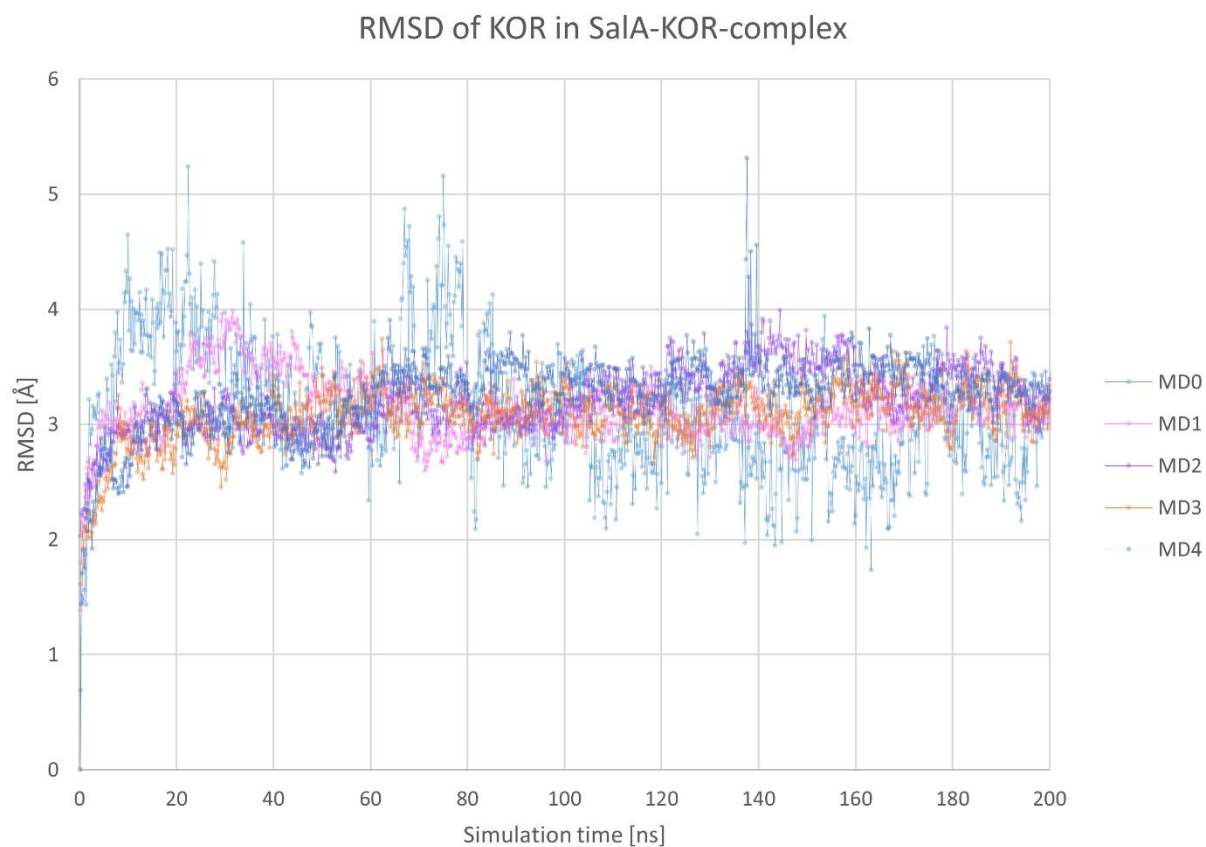

**Figure S2.** Root mean square deviation of the KOR backbone atoms in complex with Sala (**1**) over the simulation time.

|         | Identity |      |      |      | Similarity |      |      |      |
|---------|----------|------|------|------|------------|------|------|------|
|         | 1.       | 2.   | 3.   | 4.   | 1.         | 2.   | 3.   | 4.   |
| 1. hKOR |          | 53.5 | 57.4 | 50.3 |            | 67.0 | 69.6 | 64.3 |
| 2. hMOR | 56.3     |      | 60.5 | 50.3 | 70.5       |      | 70.7 | 63.8 |
| 3.hDOR  | 56.3     | 56.2 |      | 50.0 | 68.2       | 65.8 |      | 62.4 |
| 4.hNOP  | 48.9     | 46.5 | 49.7 |      | 62.6       | 59.0 | 62.1 |      |

**Figure S3.** Sequence identity and similarity of the full sequence of KOR, MOR, DOR, and NOP.

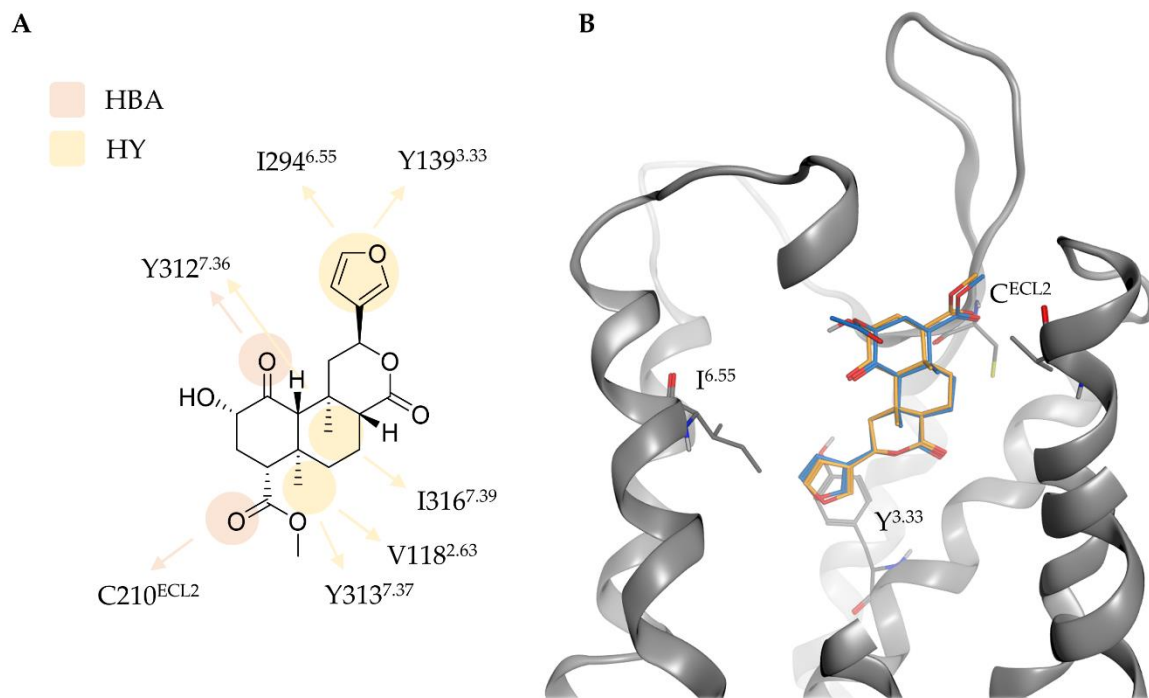

**Figure S4.** Protein-ligand interactions (A) and binding mode (B) of **2** (orange) at the KOR in comparison to SalA (blue). Y<sup>3.33</sup> denotes to Y139<sup>3.33</sup>, C<sup>ECL2</sup> to C210<sup>ECL2</sup>, and I<sup>6.55</sup> to I294<sup>6.55</sup>. Interactions types are abbreviated with HBA for hydrogen bond acceptor and HY for hydrophobic contact.

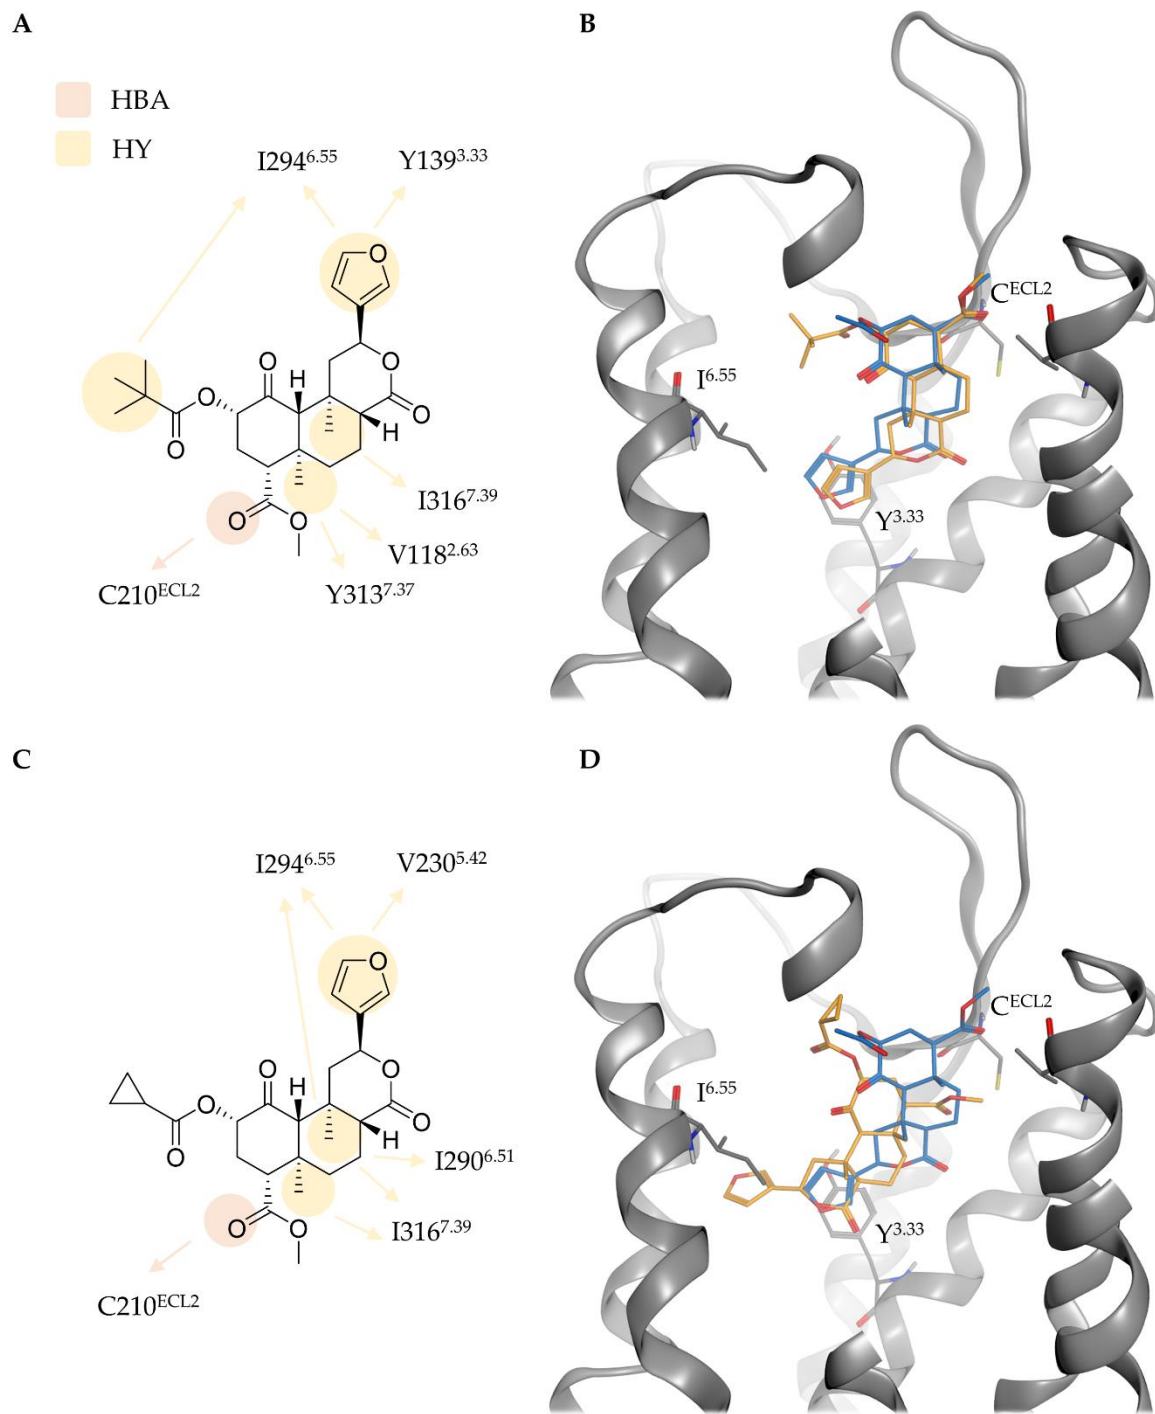

**Figure S5.** Protein-ligand interactions and binding mode of **3** (A, B, orange) and **4** (C, D, orange) at the KOR in comparison to SalA (blue). Y<sup>3.33</sup> denotes to Y139<sup>3.33</sup>, C<sup>ECL2</sup> to C210<sup>ECL2</sup>, and I<sup>6.55</sup> to I294<sup>6.55</sup>. Interactions types are abbreviated with HBA for hydrogen bond acceptor and HY for hydrophobic contact.

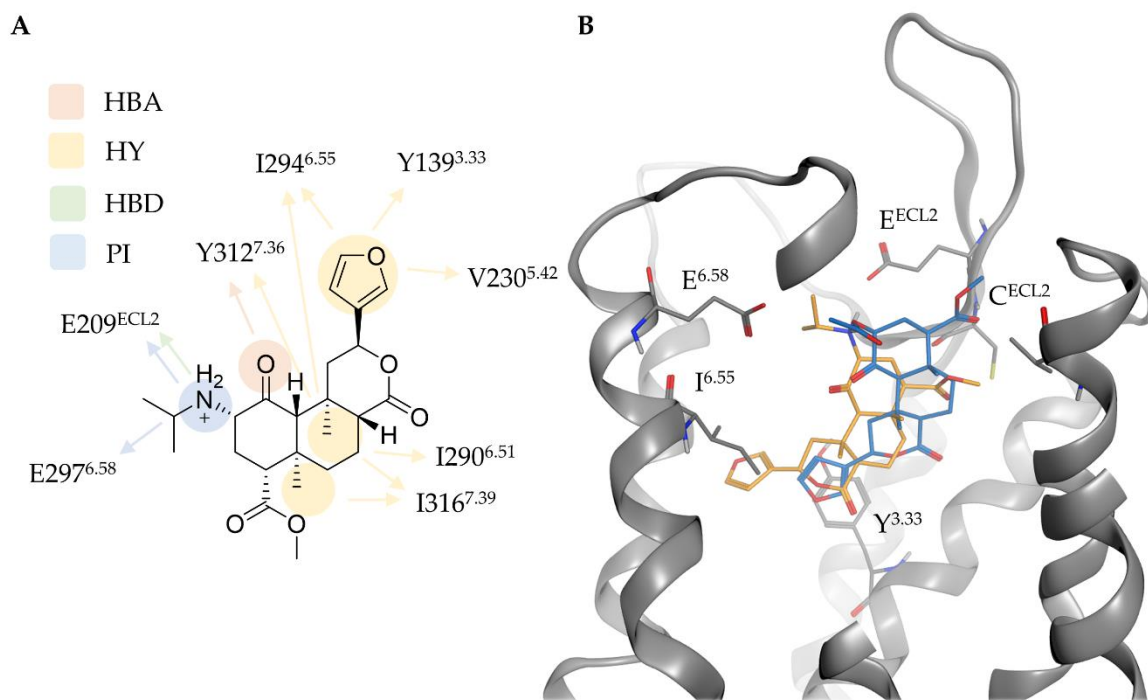

**Figure S6.** Protein-ligand interactions (A) and binding mode (B) of **5** (orange) at the KOR in comparison to SalA (blue). Y<sup>3.33</sup> denotes to Y139<sup>3.33</sup>, C<sup>ECL2</sup> to C210<sup>ECL2</sup>, and I<sup>6.55</sup> to I294<sup>6.55</sup>. Interactions types are abbreviated with HBA for hydrogen bond acceptor, HY for hydrophobic contact, HBD for hydrogen bond donor, and PI for positive charged interaction.

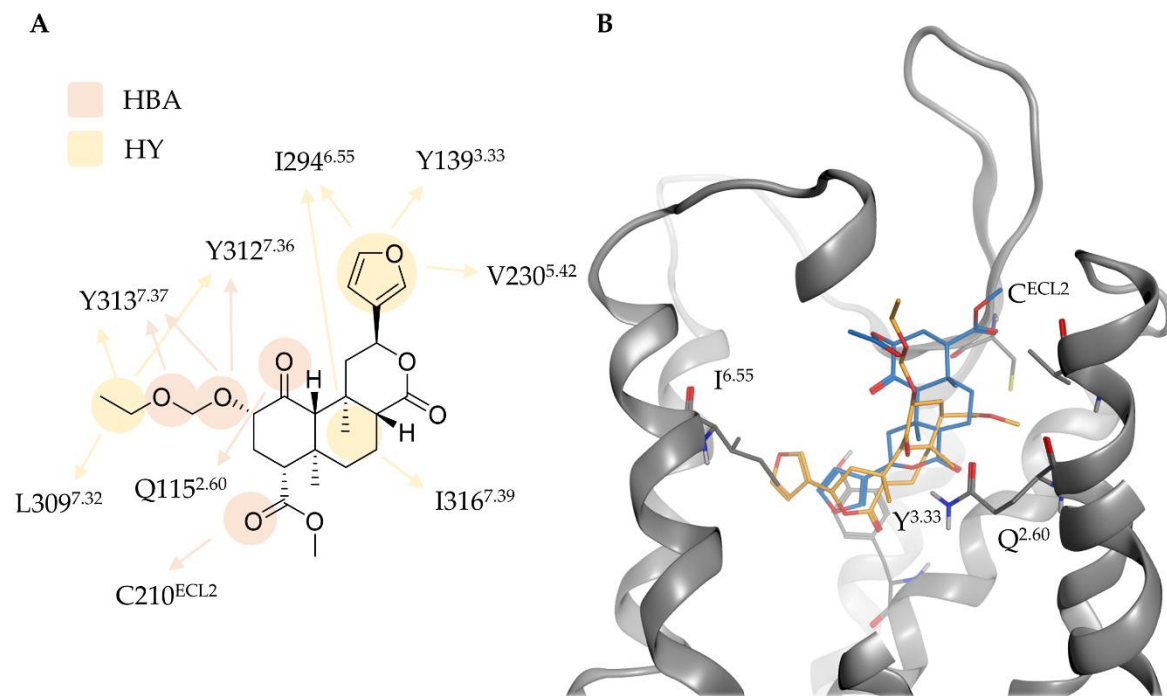

**Figure S7.** Protein-ligand interactions (A) and binding mode (B) of **6** (orange) at the KOR in comparison to SalA (blue). Y<sup>3.33</sup> denotes to Y139<sup>3.33</sup>, C<sup>ECL2</sup> to C210<sup>ECL2</sup>, and I<sup>6.55</sup> to I294<sup>6.55</sup>. Interactions types are abbreviated with HBA for hydrogen bond acceptor and HY for hydrophobic contact.



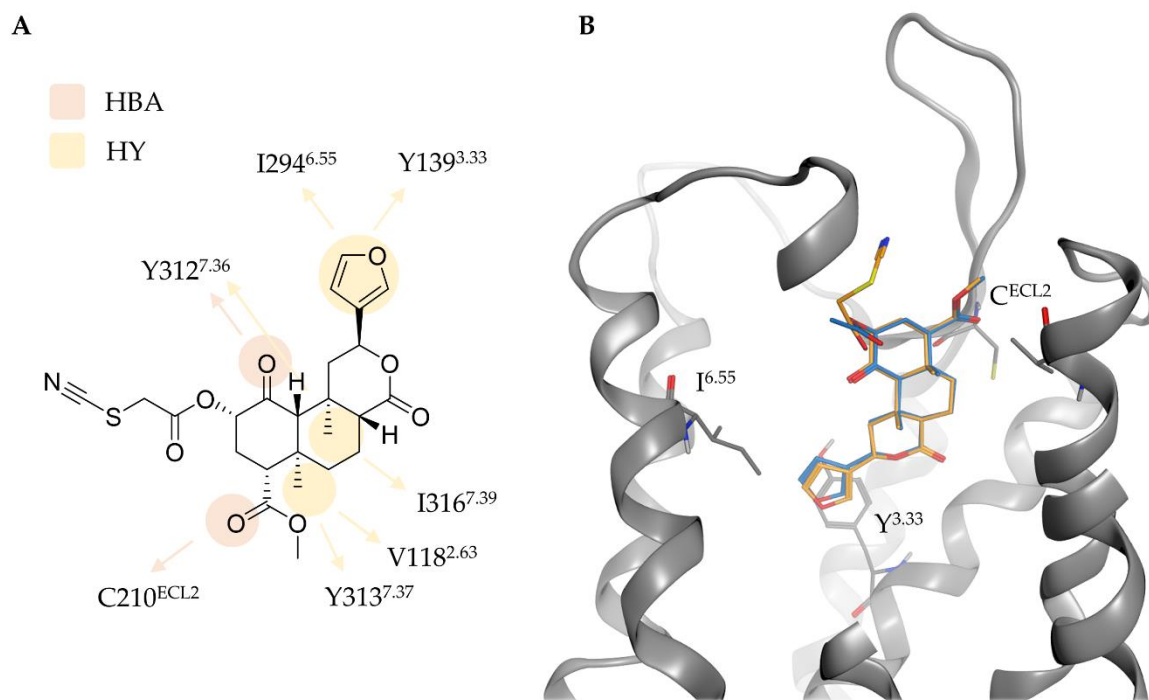

**Figure S8.** Protein-ligand interactions (A) and binding mode (B) of **7** (orange) at the KOR in comparison to SalA (blue). Y<sup>3.33</sup> denotes to Y139<sup>3.33</sup>, C<sup>ECL2</sup> to C210<sup>ECL2</sup>, and I<sup>6.55</sup> to I294<sup>6.55</sup>. Interactions types are abbreviated with HBA for hydrogen bond acceptor and HY for hydrophobic contact.

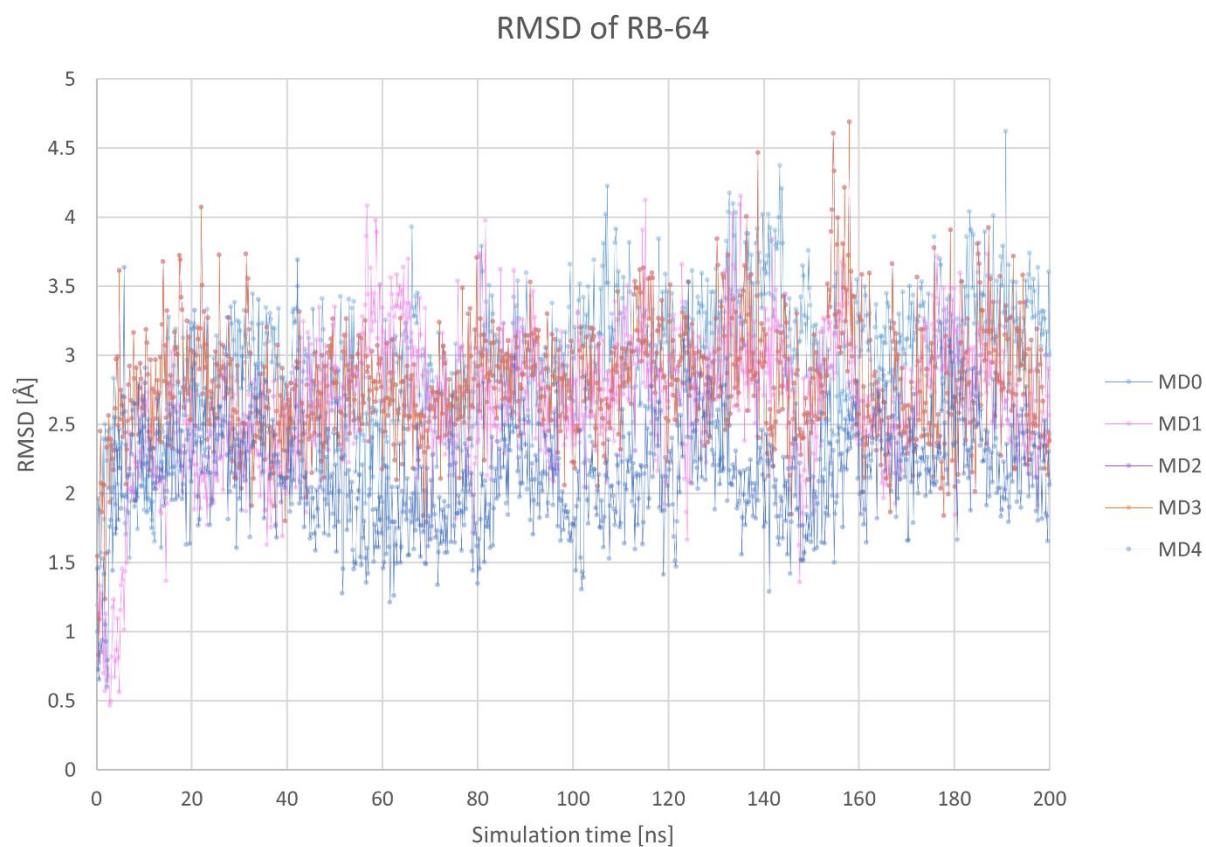

**Figure S9.** Root mean square deviation of RB-64 (7) in complex with the KOR over the simulation time.

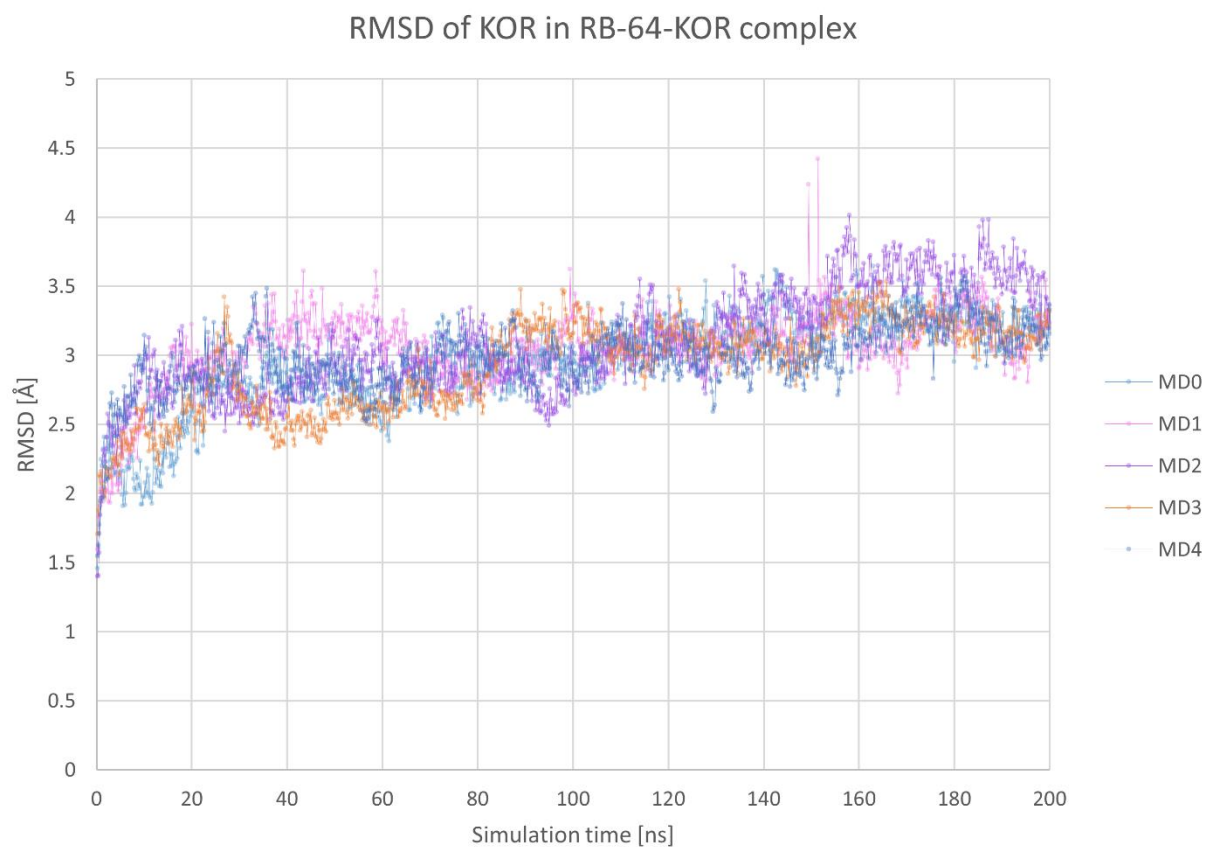

**Figure S10.** Root mean square deviation of the KOR backbone atoms in complex with RB-64 (7) over the simulation time.

**Table S1.** Energy calculations performed for the docking poses of SalA and RB64 bounded to the KOR.

| RBFE                         |                                                                           |                               |                                                                                   |                    |
|------------------------------|---------------------------------------------------------------------------|-------------------------------|-----------------------------------------------------------------------------------|--------------------|
| Software                     | Calculation                                                               | $\Delta G$ complex (kcal/mol) | $\Delta G$ solvent (kcal/mol)                                                     | RBFE (kcal/mol)    |
| Openfe [1]                   | Alchemical transformation of SalA into RB-64 bound to KOR                 | $-27.273 \pm 0.379$           | $-25.059 \pm 0.016$                                                               | $-2.214 \pm 0.395$ |
| Schrödinger Ligand FEP [2,3] | Free energy perturbation turning RB-64 to SalA bound to KOR, respectively | $-2.020 \pm 0.202$            | $-2.519 \pm 0.214$                                                                | $0.499 \pm 0.416$  |
| ABFE                         |                                                                           |                               |                                                                                   |                    |
| Software                     | Calculation                                                               | ABFE (kcal/mol)               | Difference in ABFE (kcal/mol)                                                     |                    |
| YANK [4]                     | Binding free energy of SalA bound to KOR                                  | $-16.637 \pm 0.961$           | $ \text{ABFE}(\text{SalA})  -  \text{ABFE}(\text{RB-64}) $<br>$= -3.817 \pm 2.03$ |                    |
|                              | Binding free energy of RB-64 bound to KOR                                 | $-20.454 \pm 1.069$           |                                                                                   |                    |

The abbreviations RBFE and ABFE refer to relative and absolute binding free energy. All methods predicted the binding of RB-64 to the active state KOR crystal structure (PDB-ID 6B73 [5]) favorable over the binding of SalA. The negative RBFE value in the case of openfe, where SalA is alchemically transformed into Rb-64, indicates that the latter (Rb-64) is favored over the first (SalA). The positive RBFE value in the case of Schrödinger Ligand FEP, where RB-64 is transformed into SalA, indicates the favorable binding of the first (RB-64) over the latter (SalA). In the case of YANK the absolute binding free energy of the two complexes, SalA or RB-64 bound to KOR, was calculated and compared. The more negative value for the RB-64 bound complex indicates an energetic improvement of the RB-64 bound state over the SalA-bound state.

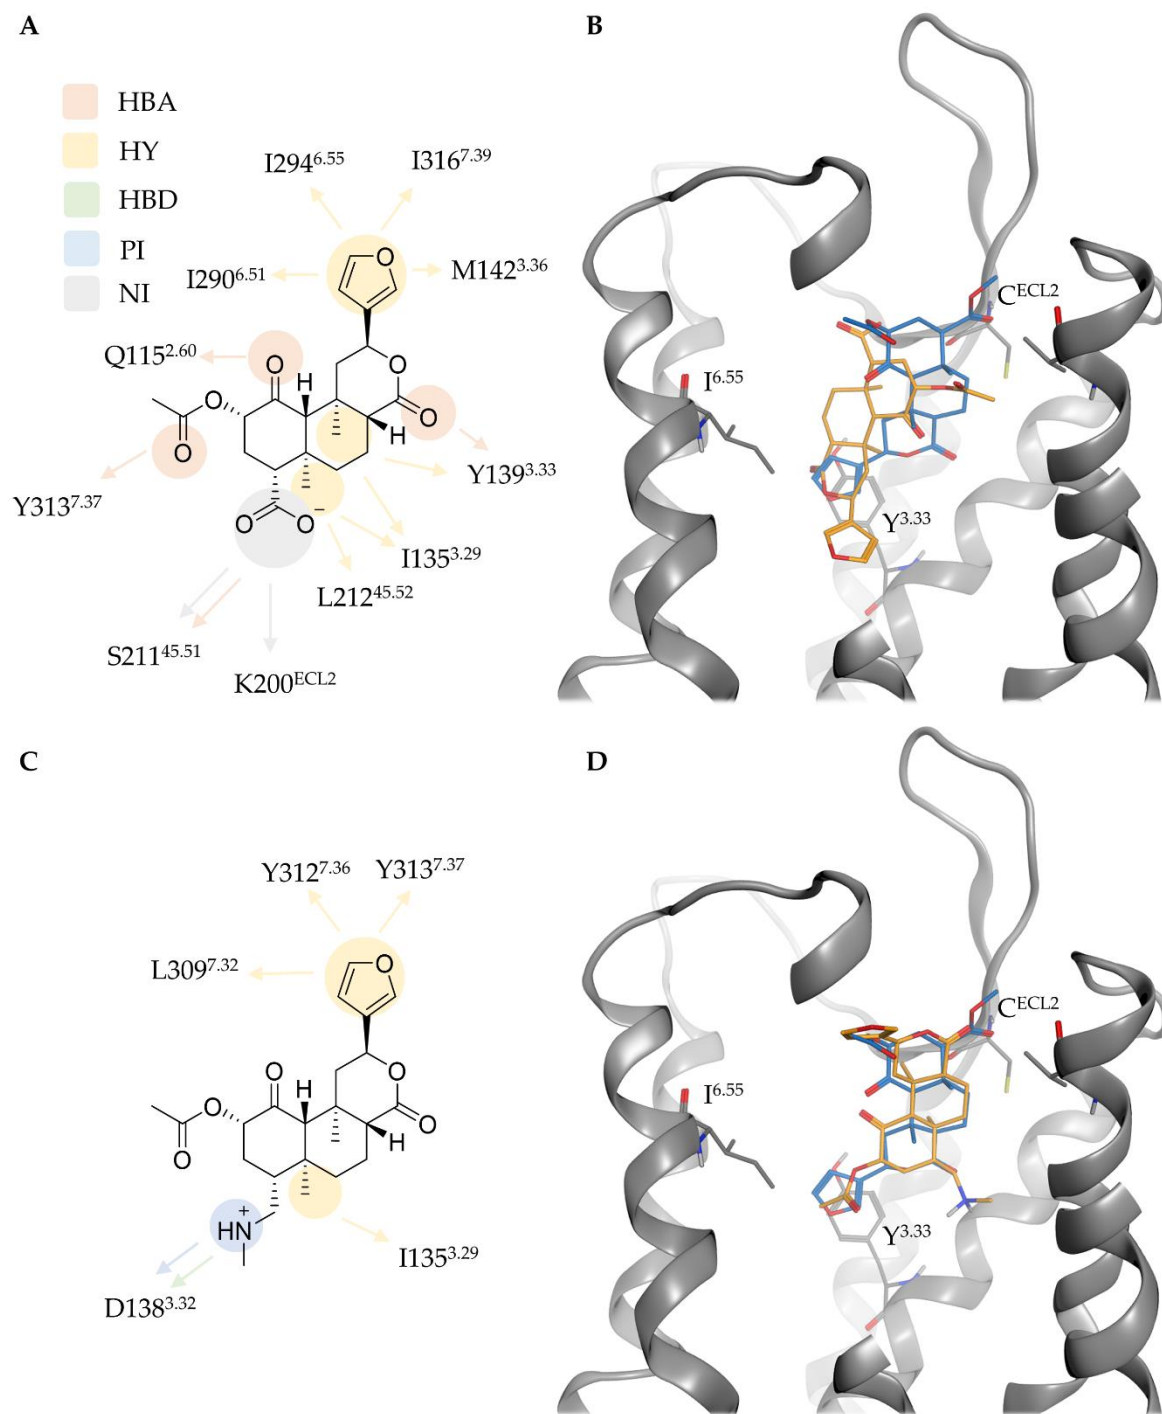

**Figure S11.** Protein-ligand interactions and binding mode of **8** (A, B, orange) and **9** (C, D, orange) at the KOR in comparison to SalA (blue). **8** is shifted in the binding side and shows an alternative Y139<sup>3.33</sup>, C<sup>ECL2</sup> to C210<sup>ECL2</sup>, and I<sup>6.55</sup> to I294<sup>6.55</sup>. Interactions types are abbreviated with HBA for hydrogen scaffold orientation while **9** shows a reversed orientation compared to SalA. Y<sup>3.33</sup> denotes to bond acceptor, HY for hydrophobic contact, HBD for hydrogen bond donor, NI for negative charged interaction, and PI for positive charged interaction.

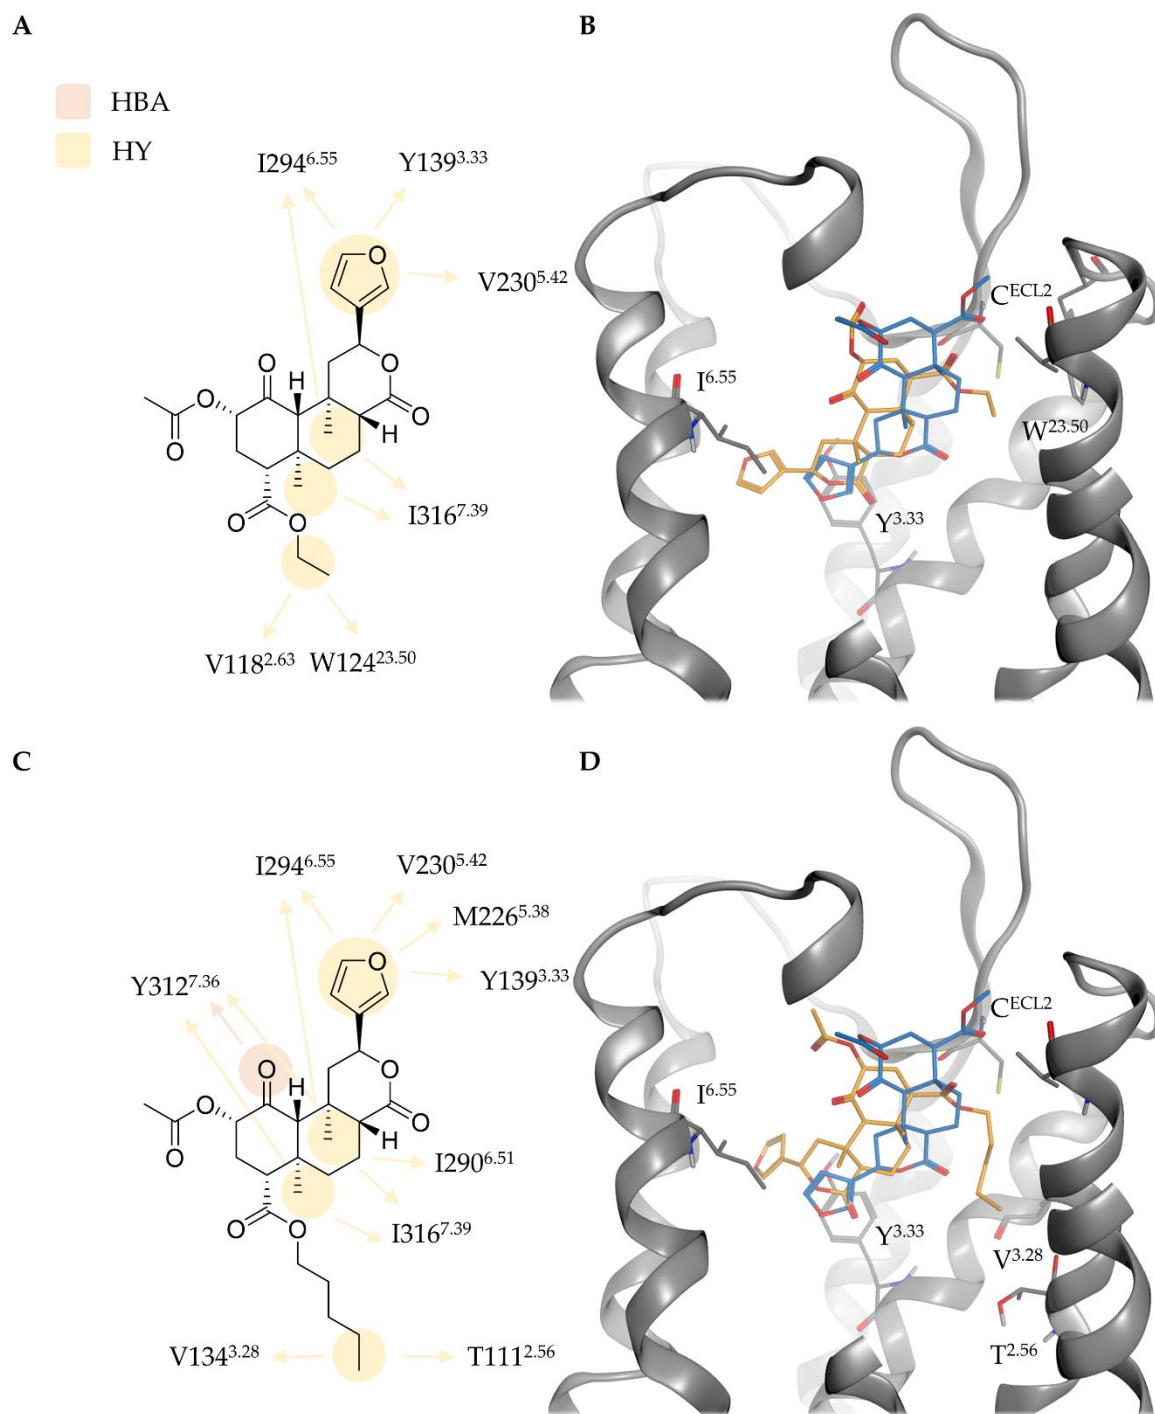

**Figure S12.** Protein-ligand interactions and binding mode of **10** (A, B, orange) and **11** (C, D, orange) at the KOR in comparison to SalA (blue). Y<sup>3.33</sup> denotes to Y139<sup>3.33</sup>, C<sup>ECL2</sup> to C210<sup>ECL2</sup>, and I<sup>6.55</sup> to I294<sup>6.55</sup>. Interactions types are abbreviated with HBA for hydrogen bond acceptor and HY for hydrophobic contact.

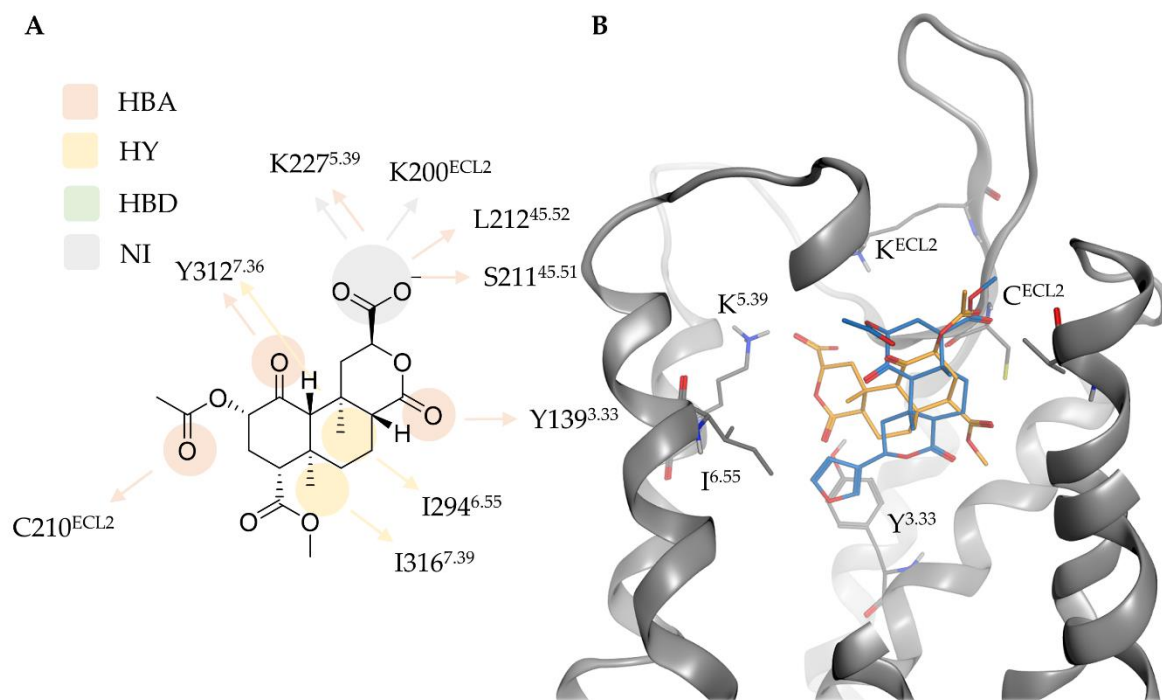

**Figure S13.** Protein-ligand interactions (A) and binding mode (B) of **13** (orange) at the KOR in comparison to SalA (blue). Y<sup>3.33</sup> denotes to Y139<sup>3.33</sup>, C<sup>ECL2</sup> to C210<sup>ECL2</sup>, and I<sup>6.55</sup> to I294<sup>6.55</sup>. Interactions types are abbreviated with HBA for hydrogen bond acceptor, HY for hydrophobic contact, HBD for hydrogen bond donor, and NI for negative charged interaction.



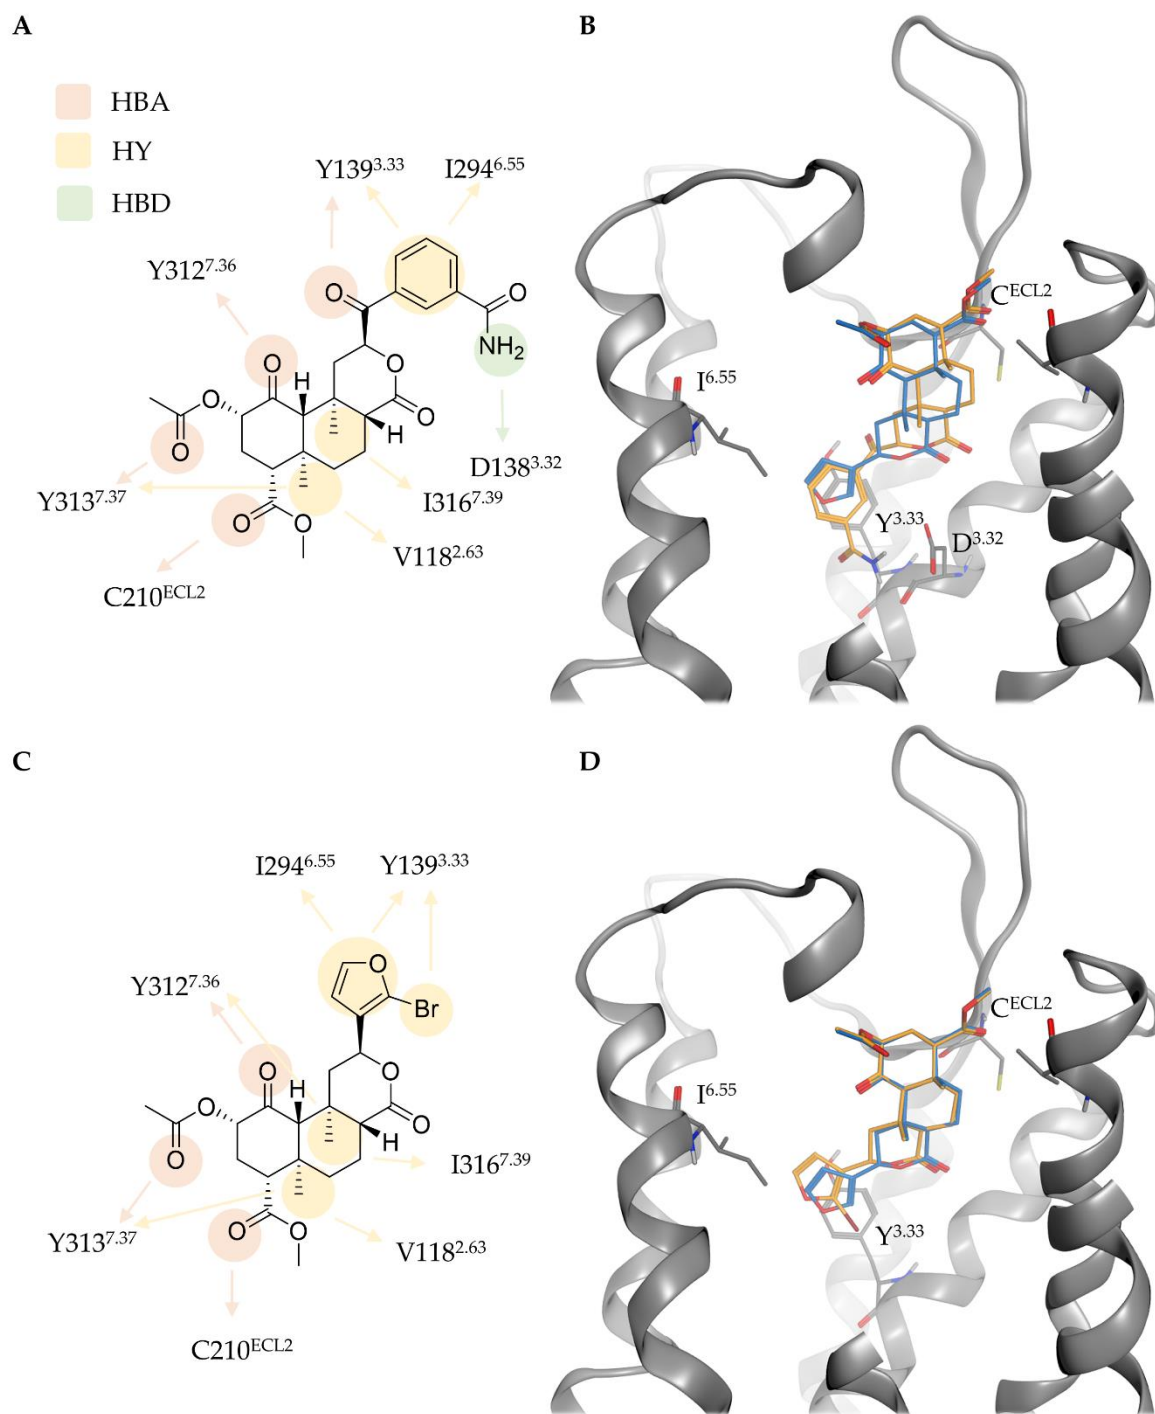

**Figure S14.** Protein-ligand interactions and binding mode of **14** (A, B, orange) and **15** (C, D, orange) at the KOR in comparison to SalA (blue). Y<sup>3.33</sup> denotes to Y139<sup>3.33</sup>, C<sup>ECL2</sup> to C210<sup>ECL2</sup>, and I<sup>6.55</sup> to I294<sup>6.55</sup>. Interactions types are abbreviated with HBA for hydrogen bond acceptor and HY for hydrophobic contact.



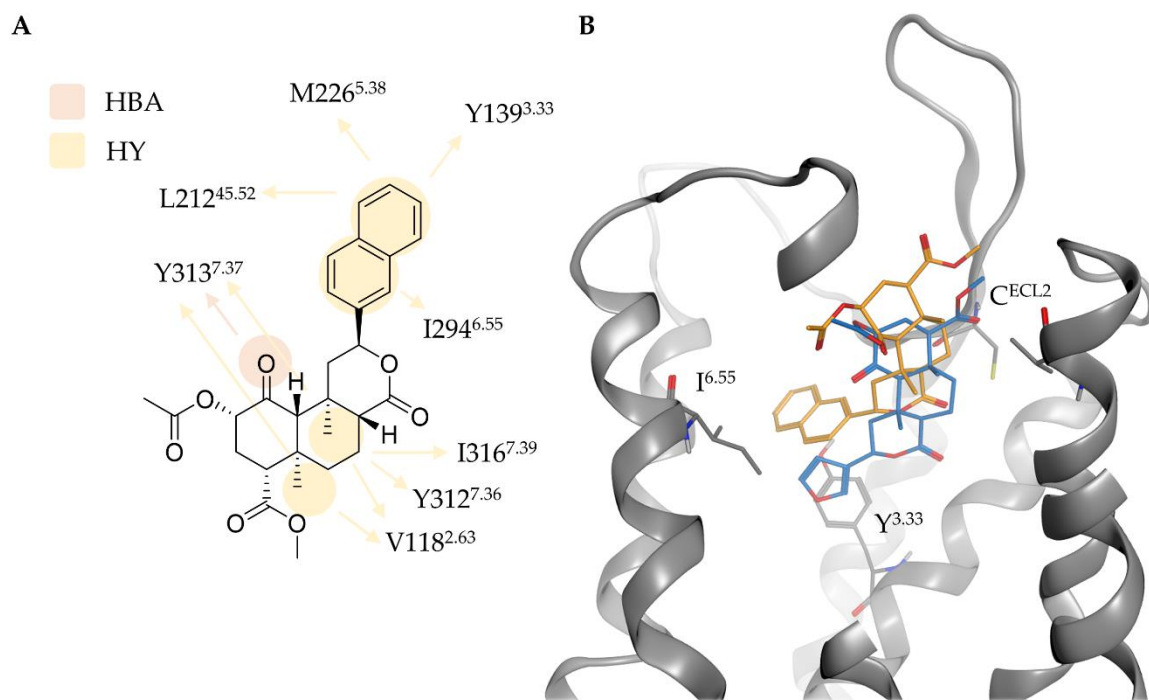

**Figure S15.** Protein-ligand interactions (A) and binding mode (B) of **16** (orange) at the KOR in comparison to SalA (blue). Y<sup>3.33</sup> denotes to Y139<sup>3.33</sup>, C<sup>ECL2</sup> to C210<sup>ECL2</sup>, and I<sup>6.55</sup> to I294<sup>6.55</sup>. Interactions types are abbreviated with HBA for hydrogen bond acceptor and HY for hydrophobic contact.

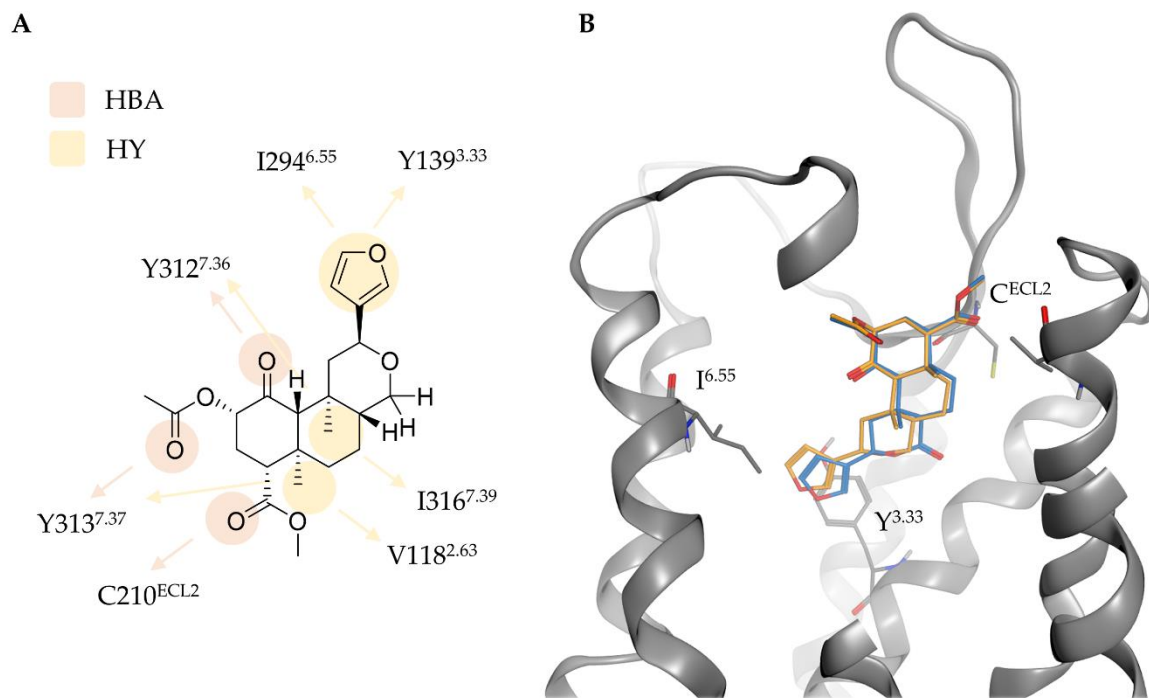

**Figure S16.** Protein-ligand interactions (A) and binding mode (B) of **17** (orange) at the KOR in comparison to SalA (blue). Y<sup>3.33</sup> denotes to Y139<sup>3.33</sup>, C<sup>ECL2</sup> to C210<sup>ECL2</sup>, and I<sup>6.55</sup> to I294<sup>6.55</sup>. Interactions types are abbreviated with HBA for hydrogen bond acceptor and HY for hydrophobic contact.

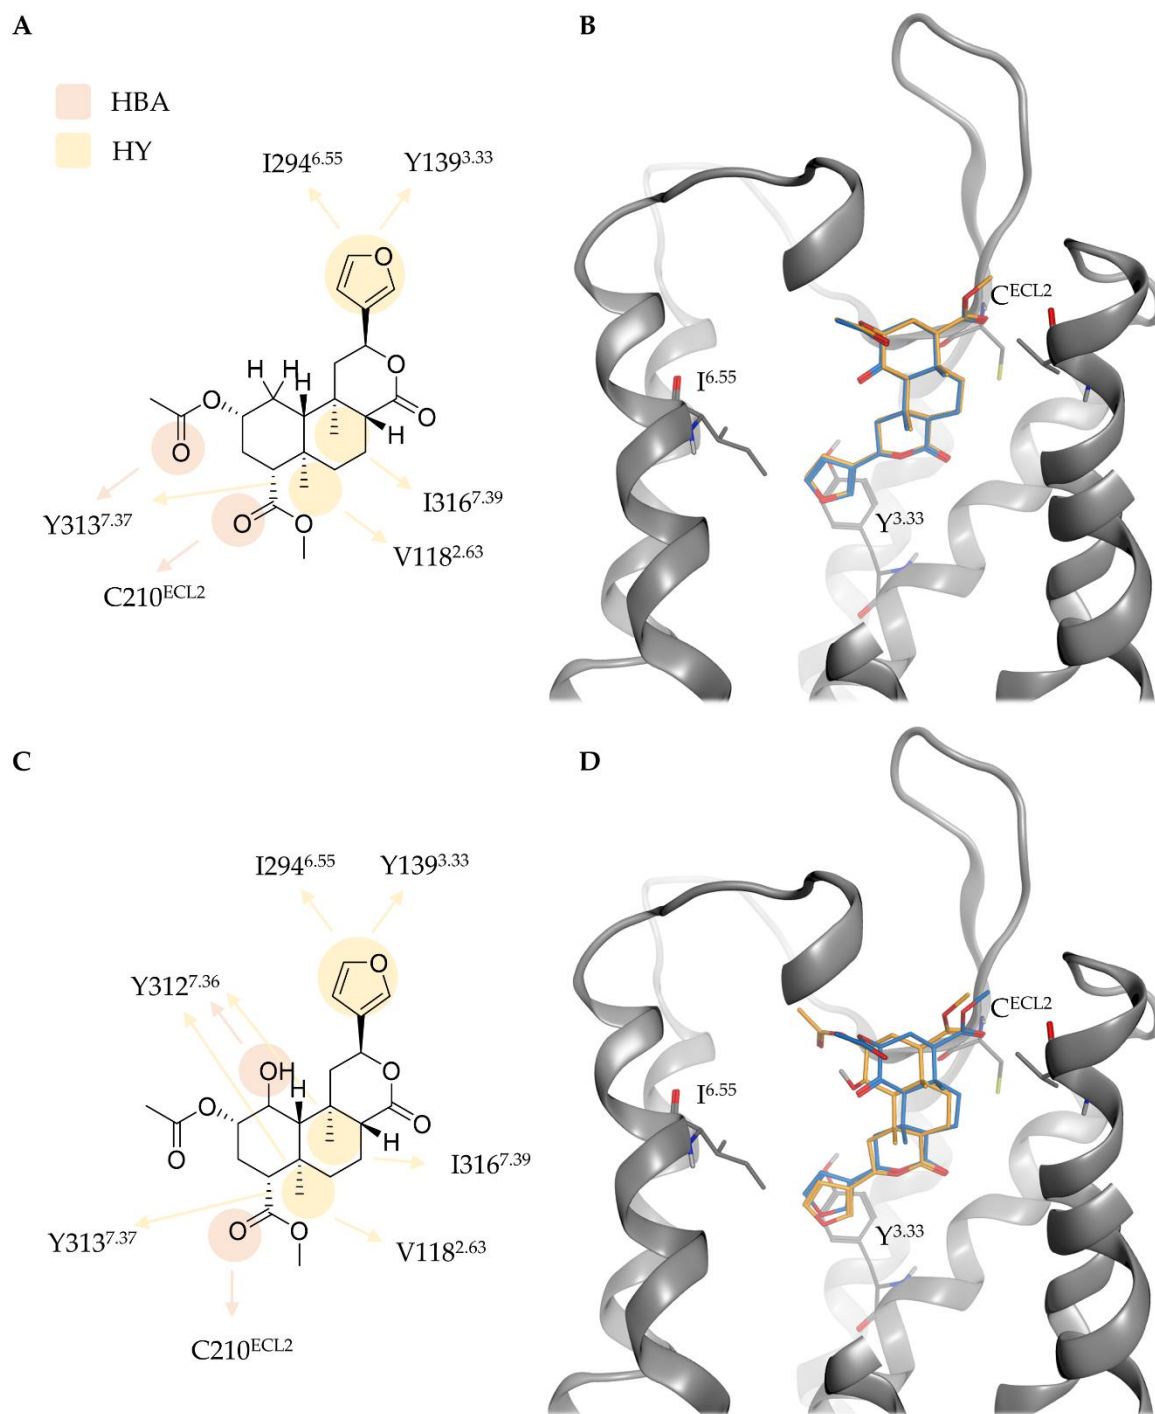

**Figure S17.** Protein-ligand interactions and binding mode of **18** (A, B, orange) and **19** (C, D, orange) at the KOR in comparison to SalA (blue Y<sup>3.33</sup> denotes to Y139<sup>3.33</sup>, C<sup>ECL2</sup> to C210<sup>ECL2</sup>, and I<sup>6.55</sup> to I294<sup>6.55</sup>). Interactions types are abbreviated with HBA for hydrogen bond acceptor and HY for hydrophobic contact.

## References:

1. Gowers, R.J.; Alibay, I.; Swenson, D.W.H.; Henry, M.M. *Open Free Energy (openfe)*, version 0.21; 2022.
2. D E Shaw Research. *Desmond Molecular Dynamics System*, 2022-1; D E Shaw Research: New York, NY, USA, 2022.
3. Bowers, K.J.; Chow, D.E.; Xu, H.; Dror, R.O.; Eastwood, M.P.; Gregersen, B.A.; Klepeis, J.L.; Kolossvary, I.; Moraes, M.A.; Sacerdoti, F.D.; et al. Scalable algorithms for molecular dynamics simulations on commodity clusters. In Proceedings of the Proceedings of the ACM/IEEE Conference on Supercomputing (SC06), Tampa, FL, USA, 11-17 November 2006.
4. Rizzi A; Grinaway P.B.; Parton D.L.; Shirts M.R.; Wang K.; Eastman P.; Friedrichs M.; Pande V.S.; Branson K.; Mobley D.L.; et al. YANK: A GPU-accelerated platform for alchemical free energy calculations. <http://getyank.org/latest/>, accessed on December 1, 2022.
5. Che, T.; Majumdar, S.; Zaidi, S.A.; Ondachi, P.; McCorvy, J.D.; Wang, S.; Mosier, P.D.; Uprety, R.; Vardy, E.; Krumm, B.E.; et al. Structure of the nanobody-stabilized active state of the kappa opioid receptor. *Cell* **2018**, 172, 55-67.e15, doi:10.1016/j.cell.2017.12.011.
